# Supplementary material
Source: MDPI journal article supplement (https://www.mdpi.com/search?q=ijms-21-05917)
Supplement: s001 [file ijms-21-05917-s001.pdf]

**Supplementary information for**

**S1 Table.** RT-PCR primers for the ER stress genes.

| <b>Gene name</b> | <b>Primer</b>                                             |
|------------------|-----------------------------------------------------------|
| GRP78            | F: TTGTTCTTGTTGGTGGCTCGACTC<br>R: GACAGCAGCACCATACGCTACAG |
| ATF4             | F: GTTCCTGCTGCCTGGTGTCTTG<br>R: GCACGCCACCTTCTCAATTCATTC  |
| CHOP             | F: CTGCTTCTCTGGCTTGGCTGAC<br>R: TTGGTCTTCCTCCTCTTCCTCCTG  |
| $\beta$ -actin   | F:CCATCATGAAGTGTGACG<br>R:GCCGATCCACACGGAGTA              |
